*Carol Wiley Cassella, M.D., Editor*

## **This Thy Bounty**

Nanette M. Schwann, M.D.\*

**T**HE sealing of the cardboard boxes  
On the floor of the back corridor  
Stainless steel sinks silently stare  
In the glimmer of civil twilight

This harvest will feed a fortunate few  
Rushed to the table awaiting  
The airborne cargo  
Bobs in floats of slushy ice

Lazarus boxes travel under weary eyes  
Sealed with clear packing tape  
Screeching with each tear  
Jagged edges sever pieces with finality

Screech, rip, cut  
The roll moves swift and smooth  
Shut—close—seal  
Relentless ritual

Overlapping layers of plastic encircle  
Precious gifts splendidly wrapped in red  
Each box on the corridor floor waits  
Glowing with a halo of incandescent light

---

\* Lehigh Valley Health Network, Allentown, Pennsylvania, and University of South Florida College of Medicine, Tampa, Florida.  
nan.schwann@lvhn.org

Accepted for publication January 3, 2012.

Copyright © 2012, the American Society of Anesthesiologists, Inc. Lippincott Williams & Wilkins. Anesthesiology 2012; 117:1133
